# Supplementary material
Source: PubMed Central journal article supplement (PMC3098118)
Supplement: NIHMS292439-supplement-1_si_001.pdf [file NIHMS292439-supplement-1_si_001.pdf]

## $\alpha$ -Synuclein-Induced Tubule Formation in Lipid Bilayers

Anjan P. Pandey<sup>†</sup>, Farzin Haque<sup>†</sup>, Jean-Christophe Rochet<sup>‡\*</sup> and Jennifer S. Hovis<sup>†\*</sup>

<sup>†</sup>Department of Chemistry, <sup>‡</sup> Department of Medicinal Chemistry and Molecular Pharmacology, Purdue University, West Lafayette, IN 47907.

### Supporting Information

*Effect of incubation time.* To investigate the effect of incubation time on the tubulation process, protein was added to the bulk solution, and images were acquired at the same spot on the bilayer immediately thereafter (~0 min), and after 5, 10, and 15 minutes. The bilayer contained 25 mol% PG. Figure S1 shows that for all four variants, tubules were seen essentially immediately. The largest extent of growth occurred from 0 to 5 minutes, regardless of the identity of the  $\alpha$ -synuclein variant.

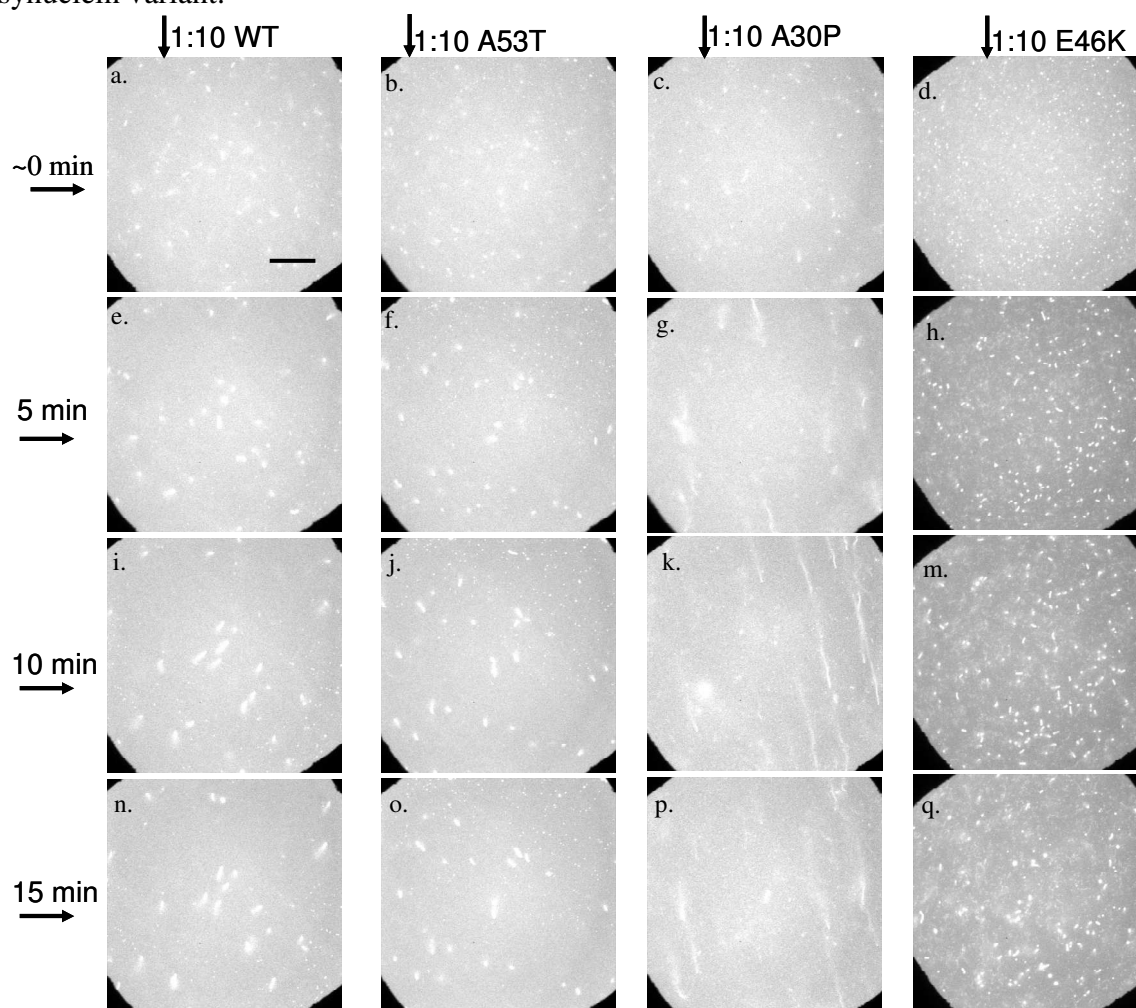

**Figure S1:** Time evolution of tubule formation: Epi-fluorescence images of bilayers containing 25 mol% PG at different time intervals (indicated by horizontal arrows) after the addition of 2.6  $\mu$ M WT, A53T, A30P, or E46K (indicated by vertical arrow). All the images in each column were acquired at the same spot. The scale bar represents 40  $\mu$ m

*Effect of addition of unlabeled protein:* In previous work, we looked at the adsorption of 2.6  $\mu\text{M}$  WT  $\alpha$ -synuclein on bilayers containing 30, 40 and 50 mol% PG.<sup>1</sup> After  $\alpha$ -synuclein addition the bilayers remained flat, and no tubules were observed. When 40 or 50 mol% PG was present the bilayers reorganized into PC-rich and PG-rich regions. In the presence of 30 mol% PG no demixing was observed in the membrane. This earlier work was done with protein that was labeled on the N-terminus (at  $\sim 20$  mol%) with Alexa 647. If unlabeled WT  $\alpha$ -synuclein was used the features observed at high anionic lipid content were reproduced: uniform, flat bilayer at 35 mol% (Figure 2a); phase-separated, flat bilayer at 50 mol% (Figure 2b).

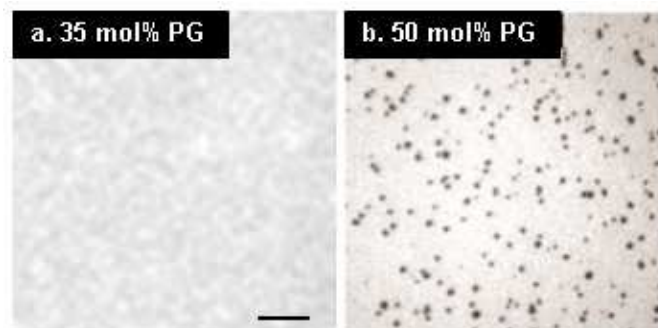

**Figure S2:** Adsorption of unlabeled protein on bilayers containing different amounts of PG: Epi-fluorescence images of bilayers with (a) 35 and (b) 50 mol% PG after the addition of 2.6  $\mu\text{M}$  WT. Each bilayer contained 0.25 mol% NBD-PC. The scale bar represents 10  $\mu\text{m}$ .

(1) Pandey, A. P., Haque, F., Rochet, J.-C., Hovis, J.S. *Biophys J* **2009**, *96*, 540.
